# Supplementary material for: Pharmacokinetic and Pharmacodynamic Relationship of Blinatumomab in Patients with Non-Hodgkin Lymphoma
Source: PubMed Central journal article supplement — Curr Clin Pharmacol. 2018 Feb;13(1):55–64. doi: 10.2174/1574884713666180518102514 (PMC6327122; doi:10.2174/1574884713666180518102514), 2018-02
Supplement: CCP-13-55_SD1.pdf [file CCP-13-55_SD1.pdf]

## SUPPLEMENTARY MATERIAL

### Pharmacokinetic and Pharmacodynamic Relationship of Blinatumomab in Patients with Non-Hodgkin Lymphoma

Youssef Hijazi<sup>1</sup>, Matthias Klinger<sup>1</sup>, Andrea Kratzer<sup>1</sup>, Benjamin Wu<sup>2</sup>, Patrick A. Baeuerle<sup>1</sup>, Peter Kufer<sup>1</sup>, Andreas Wolf<sup>1</sup>, Dirk Nagorsen<sup>2</sup> and Min Zhu<sup>2,\*</sup>

<sup>1</sup>Amgen Research (Munich) GmbH, Munich, Germany; <sup>2</sup>Amgen Inc., Thousand Oaks, CA, USA

**Supplemental Table 1. Summary of blinatumomab dose levels and schedules administered as cIV infusion in the phase 1 study of relapsed/refractory NHL<sup>a</sup>**

|                                             | All patients (N=76)                              |                                             |                                                 |
|---------------------------------------------|--------------------------------------------------|---------------------------------------------|-------------------------------------------------|
|                                             | Target dose, $\mu\text{g}/\text{m}^2/\text{day}$ | Patients with initial 4-week treatment<br>n | Patients with additional 4-week treatments<br>n |
| <b>Flat dosing</b>                          | 0.5                                              | 3                                           | –                                               |
|                                             | 1.5                                              | 6                                           | –                                               |
|                                             | 5                                                | 3                                           | –                                               |
|                                             | 15                                               | 13                                          | 1                                               |
|                                             | 30                                               | 6                                           | 1                                               |
|                                             | 60                                               | 9                                           | 3                                               |
|                                             | 90                                               | 4                                           | –                                               |
| <b>Stepwise dosing</b>                      |                                                  |                                             |                                                 |
| 5–60 $\mu\text{g}/\text{m}^2/\text{day}$    | 60                                               | 6                                           | 2                                               |
| 15–60 $\mu\text{g}/\text{m}^2/\text{day}$   | 60                                               | 2                                           | 1                                               |
| 5–15–60 $\mu\text{g}/\text{m}^2/\text{day}$ | 60                                               | 24                                          | 3                                               |

cIV continuous intravenous, NHL non-Hodgkin lymphoma.

<sup>a</sup>Additional details about doses and dosing schedules are available in Goebeler M-E, et al. *J Clin Oncol.* 2016;34(10):1104-1111.
